# Supplementary material
Source: PubMed Central journal article supplement (PMC5969458)
Supplement: CJN.07470717SupplementaryData.pdf [file CJN.07470717SupplementaryData.pdf]

## **Beta-blocker dialyzability in chronic hemodialysis patients**

Alvin Tieu (MSc), Thomas J. Velenosi (PhD), Andrew S. Kucey (MSc), Matthew A. Weir (MD) and Bradley L. Urquhart (PhD)

### **Supplemental Material**

#### **Beta-blocker Extraction and Liquid Chromatography**

Blood samples were centrifuged at 2000g for 10 minutes within one hour of collection. Plasma was separated from blood cells and subsequently stored with dialysate samples at -80°C until analysis. We determined total plasma (free and protein-bound) and dialysate concentrations of atenolol, metoprolol, bisoprolol, and carvedilol using solid phase extraction (SPE) followed by ultra-performance liquid chromatography coupled to quadrupole time-of-flight mass spectrometry (UPLC-QToFMS). Beta-blockers were extracted from plasma and dialysate samples with SPE cartridges (C18, Strata-X Polymeric Reversed Phase 33 µm) obtained from Phenomenex (Torrance, CA) conditioned according to manufacturer's specifications. Deuterated beta-blockers (atenolol-d7, metoprolol-d7, bisoprolol-d7, and carvedilol-d3) at 50 ng/mL were used as internal standards for drug quantification. Plasma, dialysate, and internal standards were passed across the SPE cartridges and washed with 1 mL of nano-pure water followed by 1 mL of 20% methanol in water. Analytes were eluted into clean glass test tubes with 1 mL of methanol solution containing 0.1% trifluoroacetic acid. Eluents were dried in a 40°C water bath using an Organomation N-EVAP™ nitrogen evaporator (Berlin, MA) and then reconstituted in mobile phase. To ensure adequate compound detection, plasma extractions containing carvedilol were concentrated by a factor of 10, while plasma samples containing other beta-blockers did not require concentration. Dried eluents from dialysate extractions were concentrated by a factor of 100. For analyte separation,

reconstituted samples were injected at a volume of 5  $\mu\text{L}$  with a flow rate of 0.7 mL/min on a Phenomenex Kinetex C8 column (1.7  $\mu\text{m}$  particle size, 50 x 2.1 mm). The Waters ACQUITY UPLC<sup>TM</sup> I-Class system (Waters, Milford, MA) autosampler maintained the column temperature at 40°C. Water (A) and acetonitrile (B), both containing 0.1% formic acid, were used as the mobile phase solutions for compound elution. The UPLC elution parameters were as follows: 0.00–0.20 min, 2% B; 0.20–1.50 min, 2–80% B; 1.50–2.50 min, 80% B; and 2.51–3.51 min, 2% B.

### **Beta-blocker Analysis with Mass Spectrometry**

We conducted mass spectrometry using a Waters Xevo<sup>TM</sup> G2S-QToFMS, and measured beta-blockers in positive electrospray ionization. The capillary and cone voltages were set at 0.5 kV and 40 V, respectively, and a source temperature of 150°C was maintained. The desolvation gas flow was 1200 L/h at a temperature of 650°C, and the cone gas flow was 50 L/h. We acquired data in centroid mode using an MS<sup>E</sup> method. Samples were acquired in positive polarity with extended dynamic range and the analyzer mode set to resolution. Both functions 1 (low energy collision) and 2 (high energy collision) of the centroid method acquired data within a mass range of 50- 1200 Da and a scan time of 0.05s. We set collision energy for function 1 of the MS<sup>E</sup> method at 0V, while for function 2 it was ramped from 15–50 V. For function 3, lockspray was acquired to maintain accurate mass detection and reproducibility. The lockmass consisted of leucine-enkephalin (1ng/ $\mu\text{L}$ ) set at a flow rate of 10  $\mu\text{L}/\text{min}$ . Acquisition of data was controlled by Waters MassLynx v4.1 software and peak integration of sample chromatograms were conducted with QuanLynx software (Waters, MA, USA).
